# Supplementary material
Source: PubMed Central journal article supplement (PMC6697130)
Supplement: NIHMS1042323-supplement-Supplementary_Material.pdf [file NIHMS1042323-supplement-Supplementary_Material.pdf]

## Supplementary Material for:

### Effects of Formant Proximity and Stimulus Prototypicality on the Neural Discrimination of Vowels: Evidence from the Auditory Frequency-Following Response

T. Christina Zhao<sup>1</sup>, Matthew Masapollo<sup>2</sup>, Linda Polka<sup>3</sup>, Lucie Ménard<sup>4</sup>, & Patricia K. Kuhl<sup>1</sup>

<sup>1</sup> Institute for Learning and Brain Sciences, University of Washington, Seattle, WA

<sup>2</sup> Department of Speech, Language and Hearing Sciences, Boston University

<sup>3</sup> School of Communication Sciences and Disorders, McGill University

<sup>4</sup> Department of Linguistics, University of Quebec at Montreal

#### S.1 Speech Synthesis

The stimuli were synthesized using the Variable Linear Articulatory Model (see Ménard *et al.* (2004). This model is based on a five-formant cascade synthesis system (Feng, 1983). The source was a pulse train generated by the Liljencrants-Fant model (Fant, Liljencrants, & Lin, 1985). The parameters related to the source (glottal symmetry quotient and open quotient) were equal to 0.8 and 0.7, respectively. The value of the first bandwidth ( $B_1$ ) was calculated according to Fant (1972). So, as a result, there might be differences in harmonic amplitudes, but this is due to the combination of models.

#### S.2 Acoustic Description of the Speech Stimuli

| Prototype | $F_1$ | $F_2$ | $F_3$ | $F_4$ | $F_5$ | $B_1$ | $B_2$ | $B_3$ | $B_4$ | $B_5$ |
|-----------|-------|-------|-------|-------|-------|-------|-------|-------|-------|-------|
| French    | 275   | 790   | 2522  | 3410  | 4159  | 85    | 30    | 35    | 20    | 35    |
| English   | 275   | 979   | 2522  | 3410  | 4159  | 85    | 30    | 35    | 20    | 35    |

Values of the lower formants (1-5) and their corresponding bandwidths for the less-focal/English /u/ and more-focal/French /u/ prototypes.

#### S.3 Acoustic and Neural Waveforms for Each Vowel Stimulus

Each vowel stimulus was 100-ms long with a 50-ms onset/offset ramp and had a mean  $F_0$  (or first harmonic, H1) of 130 Hz. Acoustic and neural FFR waveforms for each vowel are shown below in Figure S1.

#### 32 S.4 Analysis of the Neural Encoding of the Fundamental Frequency ( $F_0$ )

33 To assess the neural encoding of the fundamental frequency ( $F_0$ ), we performed a  $2 \times 2$  repeated  
34 measures analysis of variance (Vowel Type [less/focal/English /u/ vs. more focal/French /u/]  $\times$   
35 Condition [standard vs. deviant]) on the power (mV<sup>2</sup>) values in the frequency region  
36 corresponding to  $F_0$  (around 135 Hz). The results (shown in Figures 2B [in the manuscript] and  
37 S2 [below]) revealed a highly significant main effect of Vowel Type [ $F(1,18)=11.538$ ,  $p=0.003$ ,  
38  $\eta^2_p=0.391$ ], such that there were greater power values observed for the less-focal/English  
39 prototypic /u/ (mean=2199.41; 95% CI [1784.33 2614.49]) compared to the more-focal/French  
40 prototypic /u/ (mean=1321.32; 95% CI [969.56 1673.08]). The main effect of Condition did not  
41 reach statistical significance [mean<sub>Standard</sub>=1867.96, mean<sub>Deviant</sub>=1652.77;  $F(1,18)=3.965$ ,  
42  $p=0.062$ ,  $\eta^2_p=0.181$ ]. There was also no significant interaction [ $F(1,18)=0.056$ ,  $p=0.816$ ,  
43  $\eta^2_p=0.003$ ]. Taken together, these results indicate that there is more robust neural encoding of  $F_0$   
44 for the less-focal but more prototypical exemplar of the /u/ category.

45 While it may be tempting to conclude that this reflects an enhancement in the neural  
46 processing of auditory patterns that are more typical in the native-language (Kuhl & Iverson, 1995;  
47 Kuhl *et al.*, 2008), these findings are equivocal. Closer inspection of the spectral slices of the  
48 stimuli (shown in Figure 2A) indicate that the  $F_0$  values are actually different between the two  
49 vowel tokens. In addition, the spectral peak corresponding to  $F_0$  is attenuated in the more-  
50 focal/French prototypic /u/ compared to the less-focal/French prototypic /u/. Thus, in the absence  
51 of cross-language data from both English- and French-speaking listeners, we cannot draw firm  
52 conclusions about whether the enhanced encoding of  $F_0$  for the less-focal/English /u/ prototype is  
53 attributable to physical differences in the stimuli and/or long-term linguistic experience.

54 **Supplementary References**

55

56 Kuhl, P.K. & Iverson, P. (1995). Linguistic experience and the “perceptual magnet  
57 effect.” In: Strange, W, (Ed.) *Speech perception and linguistic experience: Issues in cross-*  
58 *language research*. (pp. 121-154). York Press: Baltimore, MD.

59 Kuhl, P. K., Conboy, B. T., Coffey-Corina, S., Padden, D., Rivera-Gaxiola, M. & Nelson, T.  
60 (2008). Phonetic learning as a pathway to language: new data and native language magnet  
61 theory expanded (NLM-e). *Philosophical Transactions of the Royal Society B*, 363, 979-  
62 1000.

63 Ménard, L., Schwartz, J.-L., & Böe, L.-J. (2004). The role of vocal tract morphology in speech  
64 development: Perceptual targets and sensori-motor maps for French synthesized vowels  
65 from birth to adulthood. *Journal of Speech, Language, and Hearing Research*, 47(5), 1059-  
66 1080.

## Stimulus and FFR Waveforms

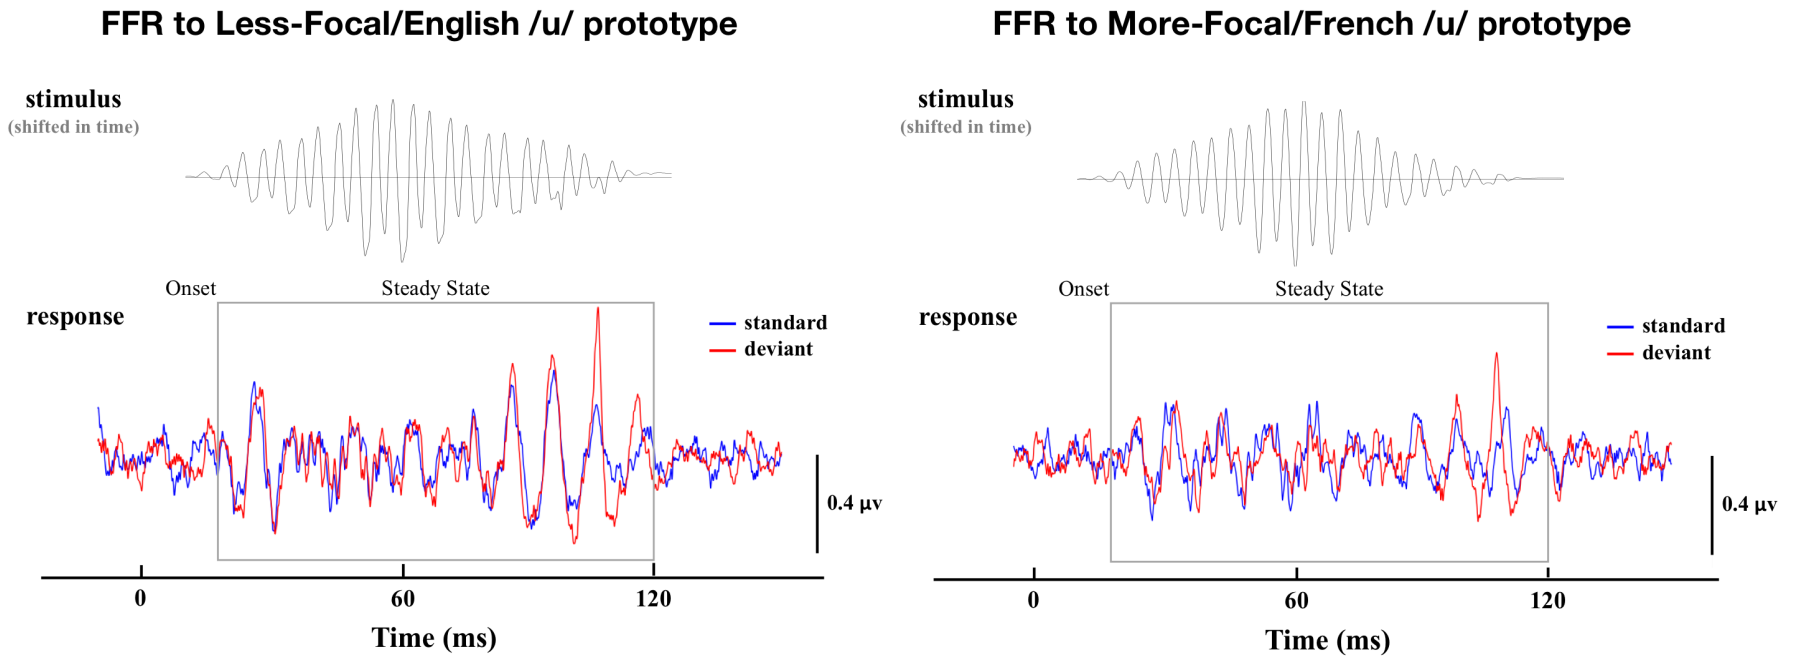

70 **Figure S1:** Stimulus (top) and neural response (bottom) waveforms for the two vowel stimuli (less-focal/English /u/ prototype vs. more-  
71 focal/French /u/ prototype).

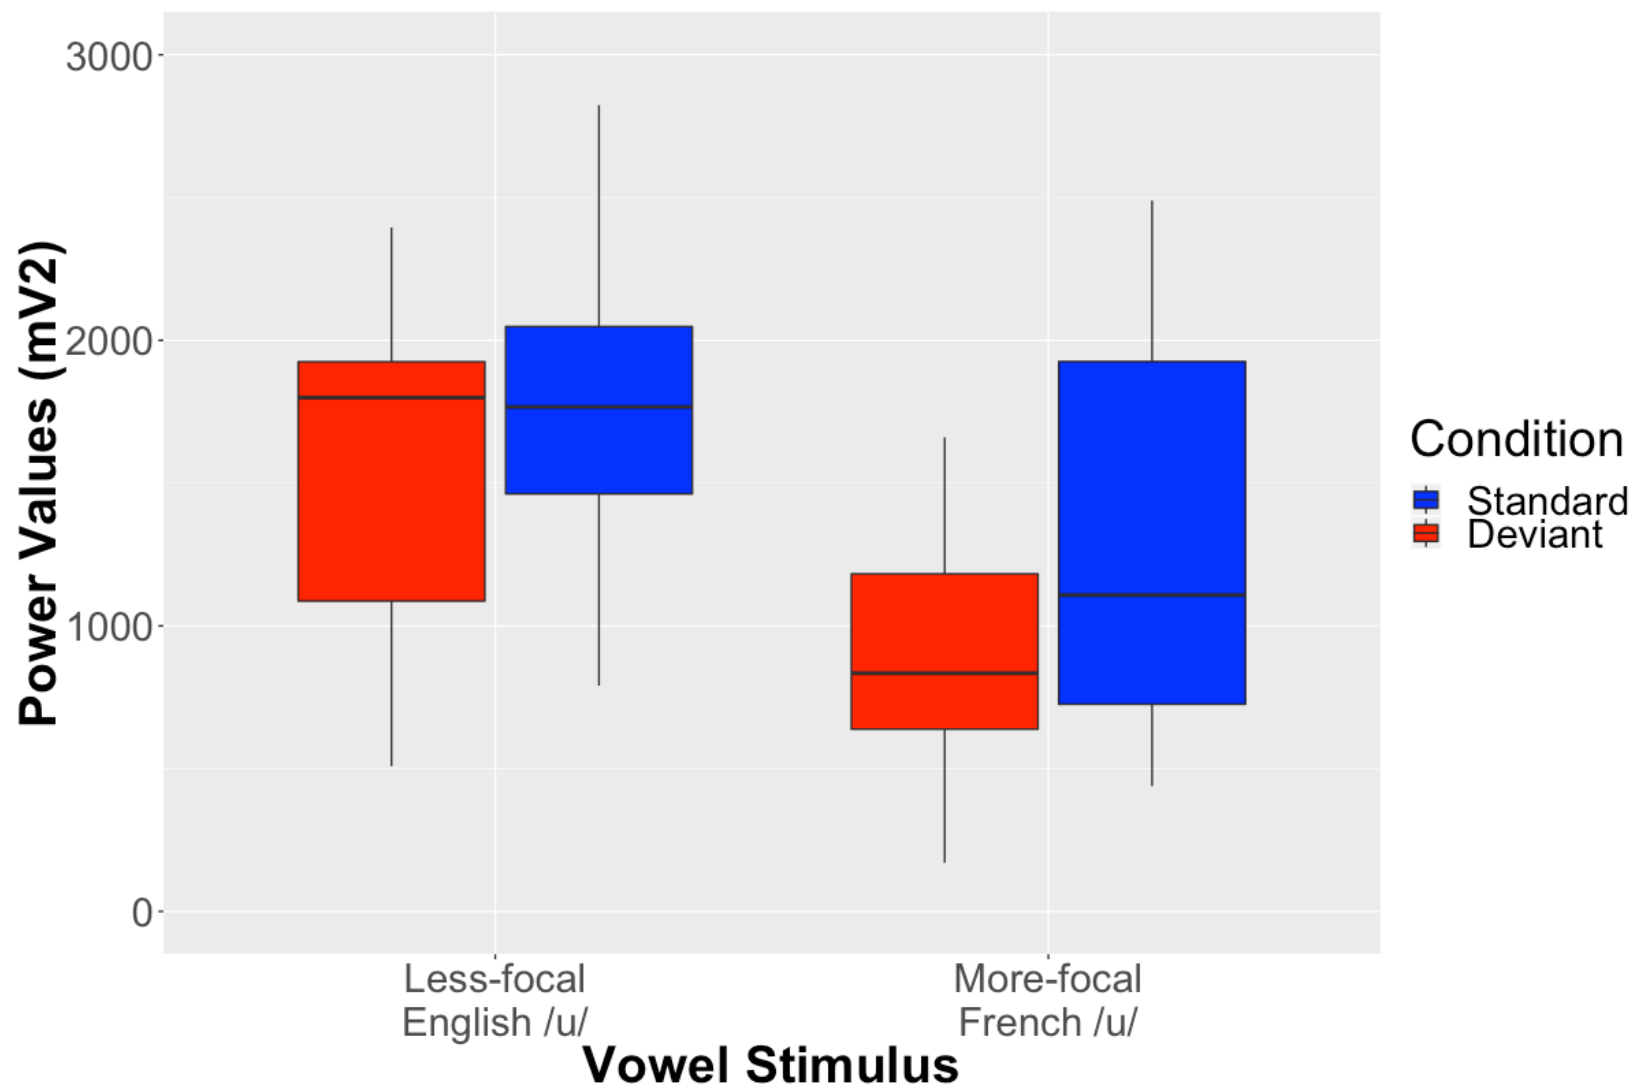

73

74 **Figure S2:** Boxplots of the mean power (mV2) values at the frequency region corresponding to the fundamental frequency ( $F_0$ ) for each  
 75 stimulus (less-focal/English /u/ prototype vs. more-focal/French /u/ prototype) as a function of condition (standard vs. deviant).
